# Supplementary material for: Multiple stimulus responsive Co-AIE framework materials with reversible solvatochromic and thermochromic behaviors: molecular design, synthesis and characterization
Source: Royal Society of Chemistry journal article supplement (doi:10.1039/d2tc03819f), 2022-01-01
Supplement: d2tc03819f1.pdf [file d2tc03819f1.pdf]

# **Multiple Stimulus Responsive Co-AIE framework Materials with Reversible Solvatochromic and Thermochromic Behaviors: Molecular design, synthesis and characterization**

*Chen Wang<sup>a</sup>, Rong Huo<sup>a</sup>, Fen Xu<sup>b</sup>, Yong-Heng Xing<sup>a\*</sup>, Feng-Ying Bai<sup>a\*</sup>*

<sup>a</sup> College of Chemistry and Chemical Engineering, Liaoning Normal University, Huanghe Road 850#, Dalian 116029, P. R. China

<sup>b</sup> Guangxi Key Laboratory of Information Materials, Guilin University of Electronic Technology, Guilin 541004, P. R. China

E-mail : [xingyongheng2000@163.com](mailto:xingyongheng2000@163.com), [baifengying2003@163.com](mailto:baifengying2003@163.com)

# ***Supporting Information***

## **Materials and Methods**

The elemental analysis was carried out on a Perkin-Elmer 240C automatic analyzer. Infrared spectra were measured on a Bruker AXSTENSOR-27 FT-IR spectrometer with pressed KBr pellets in the range of 400-4000  $\text{cm}^{-1}$  at room temperature. UV-vis spectra were recorded on JASCOV-570 spectrometer (200-800 nm, in form of solid sample) and Lambda 35 UV/VIS Spectrometer (200-800 nm, in form of liquid sample). X-ray powder diffraction (XRD) data were collected on a Bruker Advance-D8 with Cu  $K\alpha$  radiation, in the range  $5^\circ < 2\theta < 50^\circ$ , with a step size of  $0.02^\circ$  ( $2\theta$ ) and an acquisition time of 2 s per step. Thermogravimetric analysis (TG) was performed on a Perkin Elmer Diamond TG/DTA under the conditions of the  $\text{N}_2$  atmosphere in the temperature range from 30 to 800  $^\circ\text{C}$ . The photoluminescent spectra of the coordination polymers were measured on a HORIBA Fluoromax-4-TCSPC spectrofluorometer equipped with Spectra LED Pulsed LED sources at room temperature (200-1000 nm). The  $^1\text{H}$ -NMR spectra were measured on Nuclear Magnetic Resonance Spectrometer (Bruker Avance II 400).

## **Synthesis of 4',4''',4''''',4''''''' -(ethene-1,1,2,2-tetrayl)tetrakis((1,1'-biphenyl)-4-carboxylic acid)) ( $\text{H}_4\text{tcbpe}$ )<sup>1</sup>**

Weigh 4,4'-dibromobenzophenone (6.8 g, 20 mmol) and zinc powder (5.6 g, 86 mmol) into a 250 mL two-necked flask, add 100 mL of tetrahydrofuran (THF) to obtain a gray cloudy solution. The flask was then placed in an ice-water bath atmosphere, fully cooled, and  $\text{N}_2$  was continuously purged for 30 min. Drop 9-10 mL of titanium tetrachloride ( $\text{TiCl}_4$ ) with a rubber tip dropper. During the addition process, it can be found that white mist emerges from the flask and a yellow solid is produced. During this period, nitrogen gas is continuously introduced, and then the device is transferred to the oil. The mixture was refluxed at 85  $^\circ\text{C}$  for 24 h in a bath, and cooled to obtain a black solution after the reaction. The solution was fully cooled to room temperature,

the tetrahydrofuran solvent was evaporated with a rotary evaporator, and the solid after rotary evaporation was dissolved with chloroform ( $\text{CHCl}_3$ ) to obtain a black solution, which was extracted with saturated brine and concentrated hydrochloric acid, and the lower layer was separated and combined. The yellow organic phase was dried with anhydrous sodium sulfate for 12 h. Suction filtration to separate the desiccant to obtain a light-yellow transparent solution. Rotary evaporated and concentrated to the remaining 5-8 mL of solution. Column chromatography was performed with n-hexane, concentrated under reduced pressure, and dried to obtain 1,1,2,2-tetrakis(4-bromophenyl)ethylene as a white solid (M1).

Weigh the above-obtained M1 sample (1.5 g, 2.3 mmol), 4-methoxycarbonyl phenylboronic acid (2.5 g, 14 mmol), cesium fluoride (4.2 g, 28 mmol) in a 250 mL two-necked flask and place it in oil Stir in the bath, remove excess air, and protect with nitrogen for about 10 minutes; measure and add 150 mL of dry ethylene glycol dimethyl ether (DME) to the two-necked bottle, continue to protect with nitrogen for 10 minutes, and obtain a colorless transparent. Then, tetrakis(triphenylphosphine)palladium (0.2 g, 0.2 mmol) was added to the system as the catalyst for the reaction, and the whole process was heated to reflux at 65 °C for 48 h under nitrogen protection. The dark brown reaction solution was fully cooled to room temperature, and the ethylene glycol dimethyl ether solvent was evaporated under reduced pressure. The obtained solid was dissolved in dichloromethane to obtain a brownish-yellow solution, which was extracted with water. Dry over sodium sulfate for 12 h. The above solution was suction filtered to obtain a brown-yellow transparent solution, and the dichloromethane solvent was evaporated under reduced pressure to obtain a brown solid. The brown solid was then recrystallized from acetone to give M2 as a dark green solid.

Weigh M2 (1.0 g), 1 g of solid sodium hydroxide, and 105 mL of mixed solution ( $\text{THF}:\text{CH}_3\text{OH}:\text{H}_2\text{O}=1:1:1(\text{v}:\text{v}:\text{v})$ ) in a 250 mL two-necked flask, and heat at 90 °C for 12 h, a pale yellow clear solution was obtained. Then the reaction solution was fully cooled to room temperature, and the insoluble was filtered off, acidified with 6 mol/L hydrochloric acid to pH=1, filtered, washed and dried to obtain 4', 4'', 4''', 4''''-(ethylene-1,1,2,2-tetrayl)tetrakis[1,1'-biphenyl]-4-carboxylic acid ( $\text{H}_4\text{tcbe}$ ) yellow

solid.

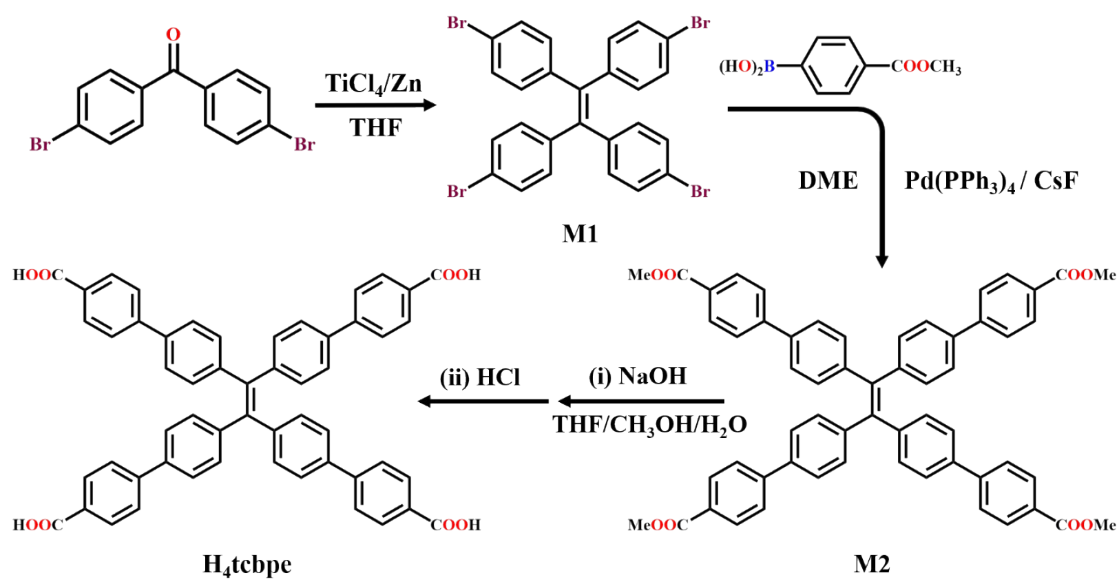

Scheme S1 The synthesis route of  $H_4tcbpe$

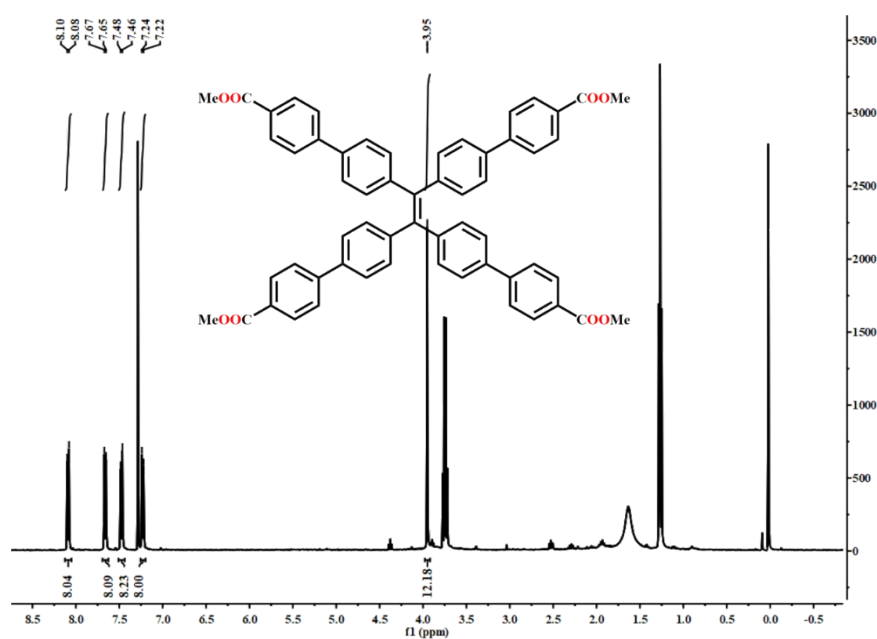

Figure S1 The  $^1H$ -NMR spectrum of M1

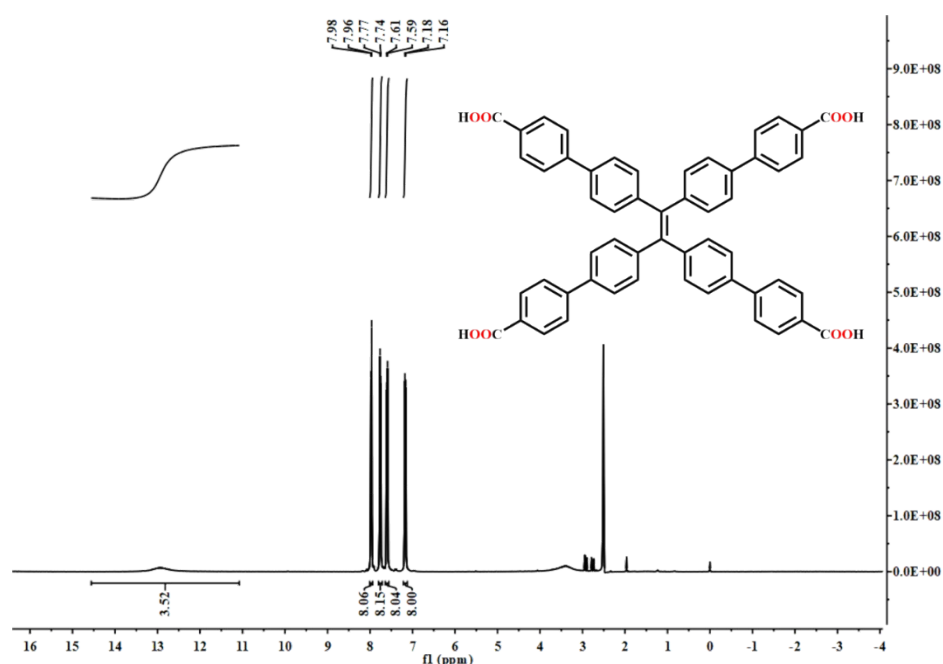

**Figure S2** The  $^1\text{H}$ -NMR spectrum of  $\text{H}_4\text{tcbpe}$

### X-ray crystallographic determination

Single crystal X-ray reflection data was collected at room temperature on a Bruker AXS SMART APEX II CCD diffractometer with Mo-K $\alpha$  ( $\lambda = 0.71073 \text{ \AA}$ ) radiation. A semiempirical absorption correction was applied by the program SADABS. The program suite SHELXL-2018<sup>2, 3</sup> and OLEX 2 platform<sup>4</sup> was used for space-group determination (XPREF), direct method structure solution (XS) and least-squares refinement (XL). Non-hydrogen atoms were refined with anisotropic displacement parameters in the final cycles. PART commands were employed on lattice ligand  $\text{tcbpe}^{4-}$  (C9, C10, C12), where ISOR commands were also applied to C9B and C12B atom. Besides, the 'OMIT 0 52' command were used to remove the bad reflections in the structure; due to the serious disorder of the solvent molecules, the 'SQUEEZE' command was used to deal with disorder of solvent DMA and  $\text{H}_2\text{O}$  molecules in **Co-tcbpe**. For Co-tcbpe, we found two alert level B "D-H Bond Without Acceptor O3-H3, O4-H4B" by checkcif in the structures. It can be attributed that O3-H3, O4-H4B, are part of water molecules or from water molecules that is likely disordered/on a partially occupied site and for the last one. The details of the crystal parameters, data collection, and refinement for **Co-tcbpe** are summarized in Table S1, and selected bond

lengths and angles with their estimated standard deviations are listed in Table S2. CCDC 2193387 contains crystallographic data for this work. These data can be obtained free of charge from the Cambridge Crystallographic Data Centre via [www.ccdc.cam.ac.uk/data\\_request/cif](http://www.ccdc.cam.ac.uk/data_request/cif).

**Table S1** Crystallographic data for the **Co-tcbpe**\*

| Complex                                      | <b>Co-tcbpe (SQUEEZE)</b>                                       |
|----------------------------------------------|-----------------------------------------------------------------|
| Formula                                      | C <sub>54</sub> H <sub>42</sub> Co <sub>3</sub> O <sub>14</sub> |
| Molecular weight                             | 1091.66                                                         |
| Crystal system                               | Orthorhombic                                                    |
| Space group                                  | <i>Imma</i>                                                     |
| <i>a</i> /Å                                  | 43.283(3)                                                       |
| <i>b</i> /Å                                  | 28.3063(18)                                                     |
| <i>c</i> /Å                                  | 6.3675(4)                                                       |
| $\alpha$ /(°)                                | 90                                                              |
| $\beta$ /(°)                                 | 90                                                              |
| $\gamma$ (°)                                 | 90                                                              |
| V (Å <sup>3</sup> )                          | 7801.3(9)                                                       |
| Z                                            | 4                                                               |
| D <sub>calc</sub> /(g·cm <sup>-3</sup> )     | 0.929                                                           |
| F(000)                                       | 2236.0                                                          |
| $\mu$ / mm <sup>-1</sup>                     | 0.673                                                           |
| 2 $\theta$ range/(°)                         | 4.738-51.996                                                    |
| Reflections collected                        | 42401                                                           |
| Independent reflections [ $I > 2\sigma(I)$ ] | 3954                                                            |
| Parameters                                   | 203                                                             |
| Goodness of fit                              | 1.117                                                           |
| R <sub>1</sub> <sup>a</sup>                  | 0.0832 (0.1242) <sup>b</sup>                                    |
| wR <sub>2</sub> <sup>a</sup>                 | 0.1883 (0.1990) <sup>b</sup>                                    |
| $\Delta(\rho)$ (e Å <sup>-3</sup> )          | 0.44 and -0.60                                                  |

\* a.  $R = \sum ||F_o| - |F_c|| / \sum |F_o|$ ,  $wR_2 = (\sum (w(F_o^2 - F_c^2)^2) / \sum (w(F_o^2)^2))^{1/2}$ ; b.  $[F_o > 4\sigma(F_o)]$ ; b. based on all data.

**Table S2** The selected bonds (Å) and angle (°) of **Co-tcbpe**

| <b>Co-tcbpe</b>    |
|--------------------|
| Selected bonds (Å) |

|                                        |            |                                          |           |
|----------------------------------------|------------|------------------------------------------|-----------|
| Co1-O3 <sup>#3</sup>                   | 2.0459(4)  | Co1-O3                                   | 2.0458(4) |
| Co1-O2 <sup>#2</sup>                   | 2.1208(3)  | Co1-O2 <sup>#4</sup>                     | 2.1208(3) |
| Co1-O2 <sup>#6</sup>                   | 2.1208(3)  | Co1-O2 <sup>#5</sup>                     | 2.1208(3) |
| Co2-O3                                 | 2.0578(3)  | Co2-O3 <sup>#2</sup>                     | 2.0579(3) |
| Co2-O1                                 | 2.0888(3)  | Co2-O1 <sup>#5</sup>                     | 2.0889(4) |
| Co2-O4 <sup>#5</sup>                   | 2.1364(4)  | Co2-O4                                   | 2.1364(4) |
| C14-C14 <sup>#8</sup>                  | 1.3056(17) | C14-C11 <sup>#7</sup>                    | 1.5120(7) |
| C3-C4                                  | 1.3881(8)  | C1-O1                                    | 1.2498(6) |
| Selected angle (°)                     |            |                                          |           |
| O3-Co1-O3 <sup>#3</sup>                | 180.0      | O3-Co1-O2 <sup>#2</sup>                  | 85.31(12) |
| O3 <sup>#3</sup> -Co1-O2 <sup>#2</sup> | 94.69(12)  | O3-Co1-O2 <sup>#4</sup>                  | 94.69(12) |
| O3 <sup>#3</sup> -Co1-O2 <sup>#5</sup> | 85.31(12)  | O2 <sup>#4</sup> -Co1-O2 <sup>#6</sup>   | 89.0(2)   |
| O3-Co2-O4 <sup>#5</sup>                | 94.31(15)  | O3 <sup>#2</sup> -Co2-O1                 | 96.78(16) |
| O3 <sup>#2</sup> -Co2-O4 <sup>#5</sup> | 177.20(16) | C1-O2-Co1 <sup>#1</sup>                  | 134.7(3)  |
| O3 <sup>#4</sup> -Co1-O3               | 180.0      | C26 <sup>#5</sup> -C26-C12 <sup>#6</sup> | 122.4(6)  |
| O1-C1-O2                               | 125.5(4)   | C14 <sup>#8</sup> -C14-C11 <sup>#7</sup> | 122.7(4)  |
| C11 <sup>#7</sup> -C14-C11             | 114.6(7)   | C4-C3-C2                                 | 119.6(5)  |

\***Co-tcbpe**: #1 x, y, z+1; #2 -x+1/2, -y-1/2, -z+1/2; #3 -x+1/2, -y-1/2, -z-1/2; #4 x, y, z-1; #5 -x+1/2, y, -z+1/2; #6 x, -y-1/2, z-1; #7 -x, y, z; #8 -x, -y-1, -z+2.

## Structural Characterization

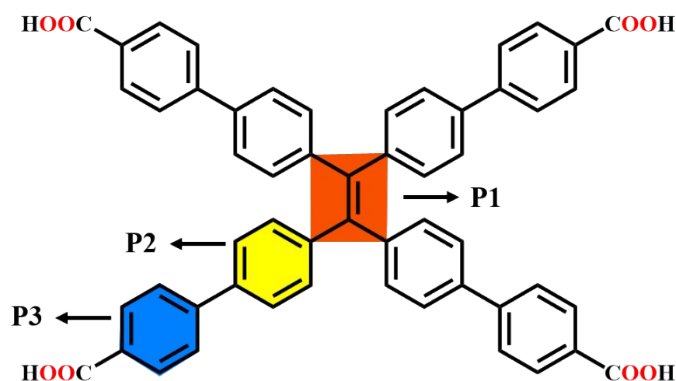

**Figure S3** Plane definitions within the structure of  $H_4tcbpe$ : Orange plane P1 is defined by the two C atoms forming the central C=C double bond and four C atoms surround them; The yellow and blue phenyl rings define the P2 and P3 plane crossing them, respectively

**Table S3** Gradual decrease of mass of a sample of **Co-tcbpe** recorded in the TGA experiment

| Segment | Upper limit | Loss of mass from TGA | Description                                                                       |
|---------|-------------|-----------------------|-----------------------------------------------------------------------------------|
| A       | 194 °C      | 26.16%                | DMA and H <sub>2</sub> O in the hydrophobic pores                                 |
| B       | 524 °C      | 23.33%                | Coordinated H <sub>2</sub> O, bridging OH <sup>-</sup> anion and partly framework |
| C       | 560 °C      | 9.4%                  | Framework decomposition                                                           |
| D       | -           | -                     | Mineralized sample                                                                |

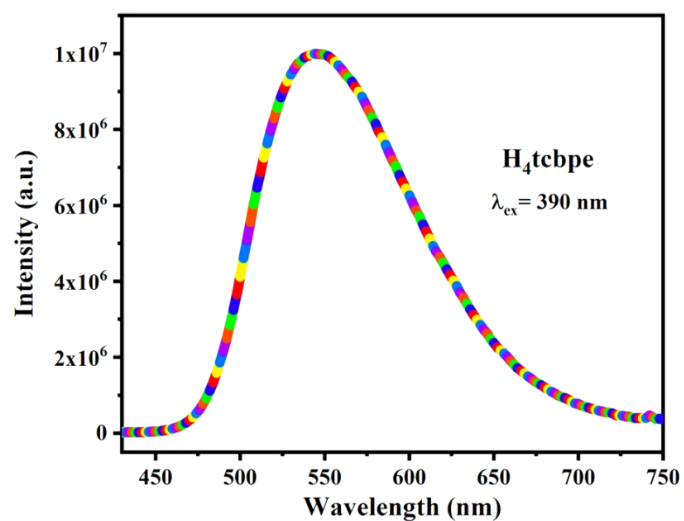

**Figure S4** The solid fluorescence emission spectrum of H<sub>4</sub>tcbpe ligand ( $\lambda_{\text{ex}}$ =390 nm)

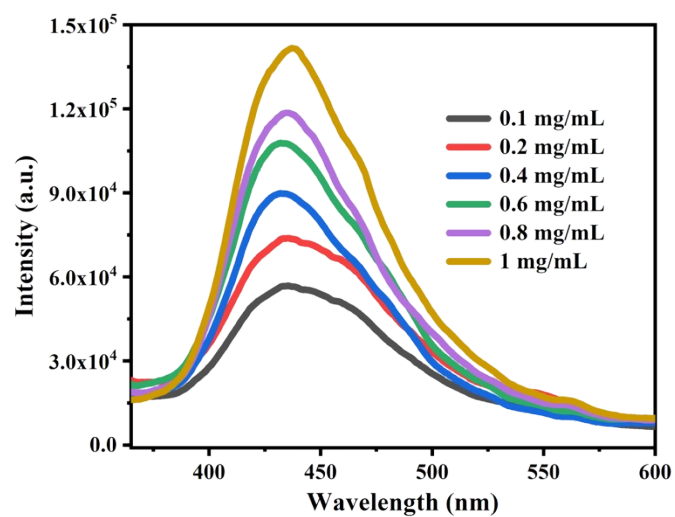

**Figure S5** The AIE effect of Co-tcbpe in EtOH solvent ( $\lambda_{\text{ex}}$ =320 nm)

## Solvatochromic Behavior

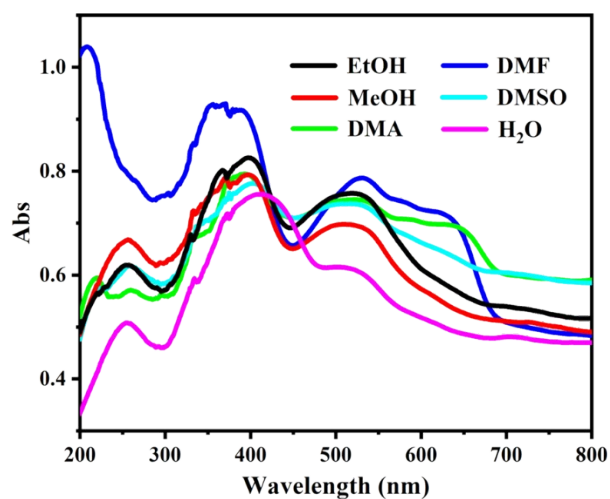

**Figure S6** The UV-vis spectra of **Co-tcbpe** detailed with different solvents

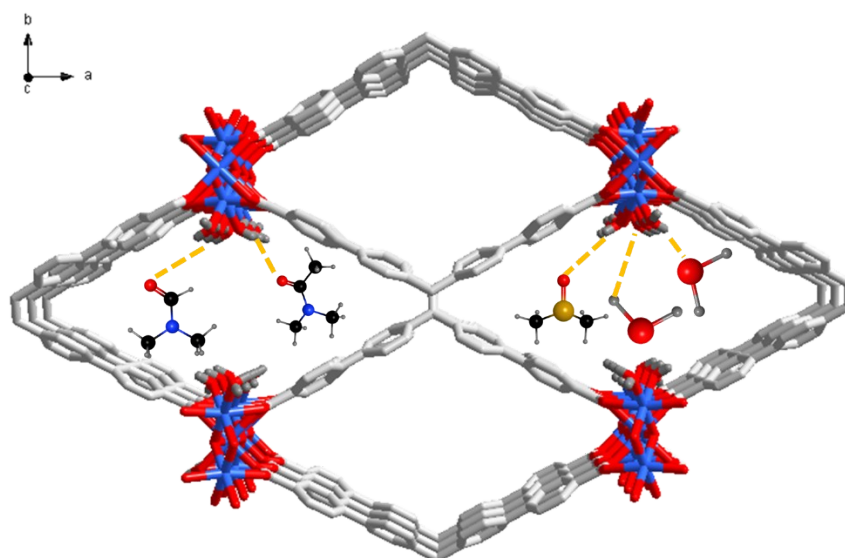

**Figure S7** Schematic diagram of hydrogen bonding interaction between different solvent molecules and coordinated water molecules in the **Co-tcbpe** structure.

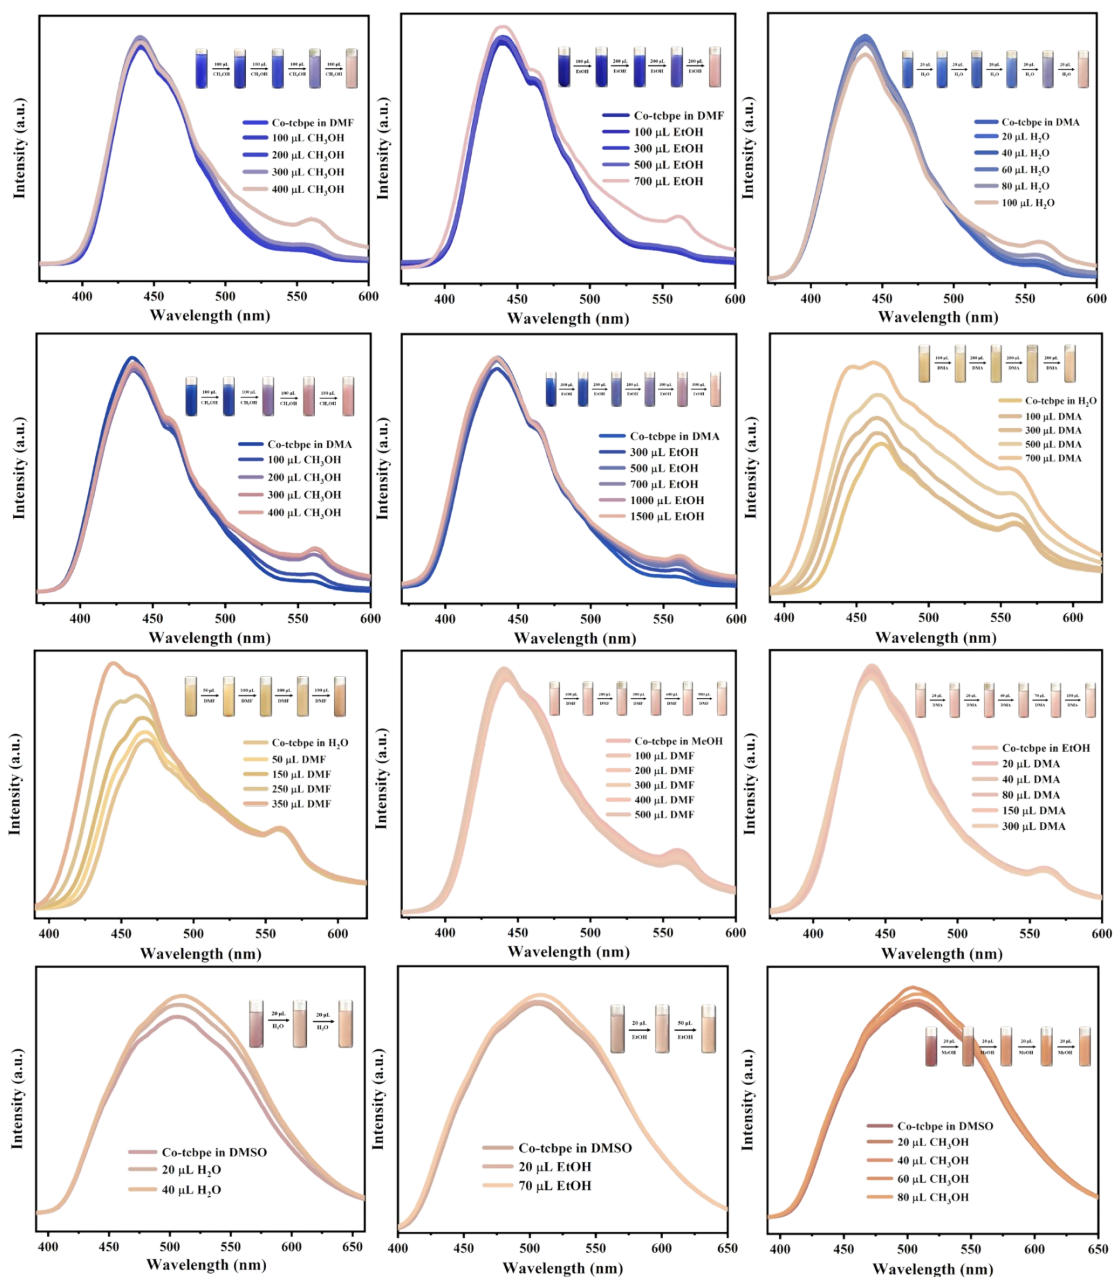

**Figure S8** Change of the fluorescence spectra of the **Co-tcbpe** in six different solutions before and after adding different volumes of other solvents

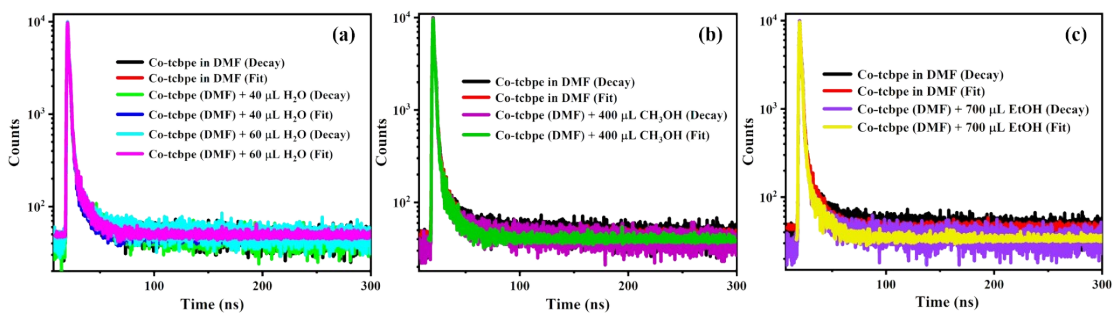

**Figure S9** The fluorescence lifetime of **Co-tcbpe** in DMF before and after adding  $\text{H}_2\text{O}$  (a),

CH<sub>3</sub>OH (b) and EtOH (c)

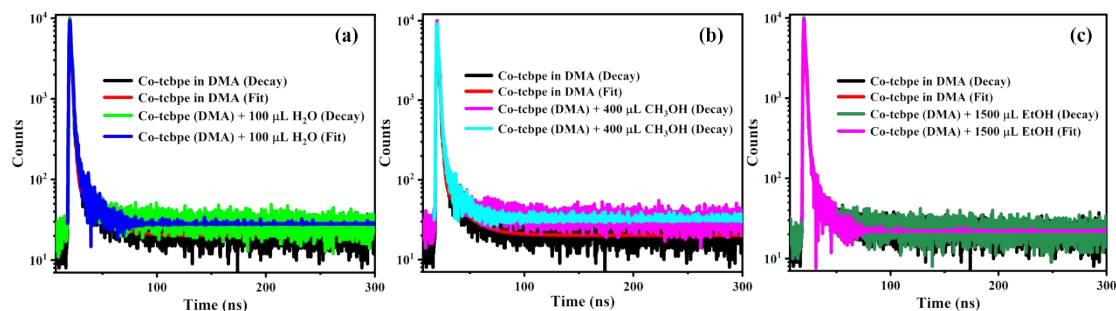

**Figure S10** The fluorescence lifetime of **Co-tcbpe** in DMA before and after adding H<sub>2</sub>O (a), CH<sub>3</sub>OH (b) and EtOH (c)

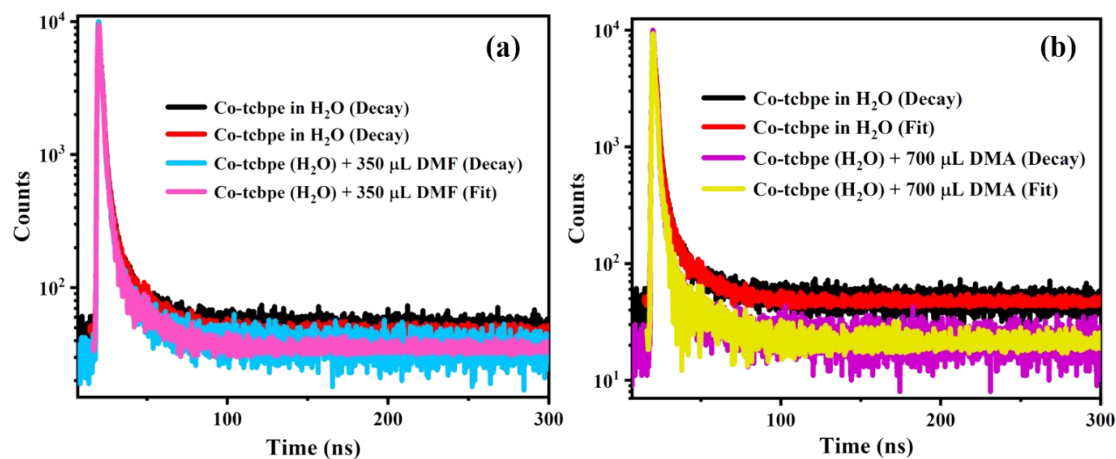

**Figure S11** The fluorescence lifetime of **Co-tcbpe** in H<sub>2</sub>O before and after adding DMF (a) and DMA (b)

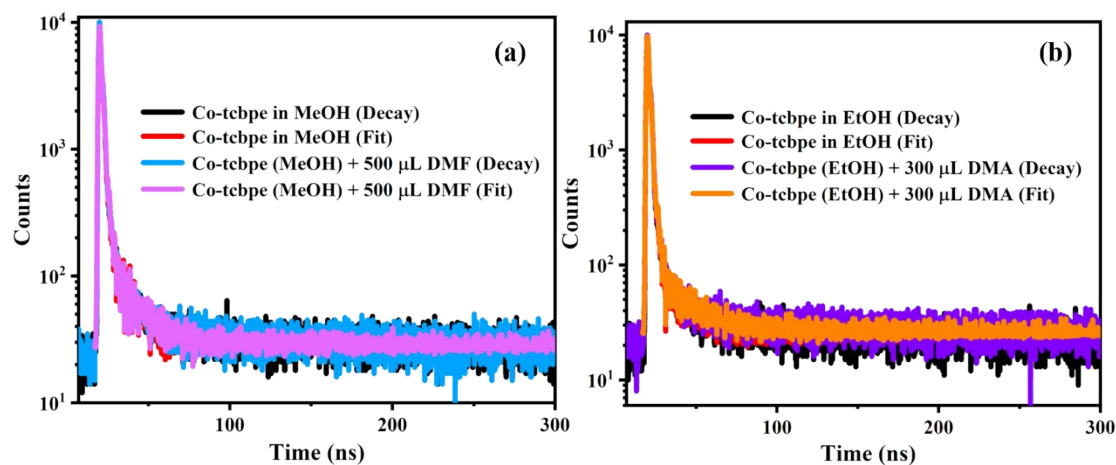

**Figure S12** The fluorescence lifetime of **Co-tcbpe** in MeOH and EtOH before and after adding

DMF (a) DMA (b)

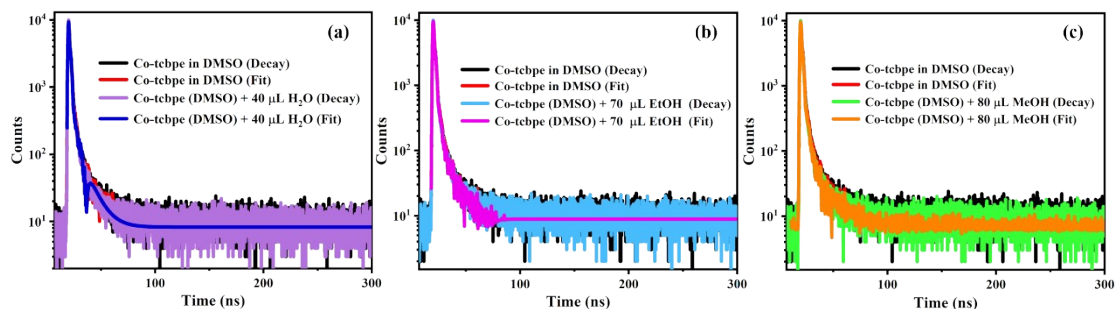

**Figure S13** The fluorescence lifetime of **Co-tcbpe** in DMSO before and after adding H<sub>2</sub>O (a), EtOH (b) and MeOH (c)

**Table S4** The fluorescence lifetime of **Co-tcbpe** in six different organic solvents before and after adding other solvents

|                                                             | Lifetime (ns)                                         | Average lifetime (s)     |
|-------------------------------------------------------------|-------------------------------------------------------|--------------------------|
| <b>Co-tcbpe</b> in DMF                                      | $\tau_1=0.2940$ ; $\tau_2=3.241$ ;<br>$\tau_3=0.3918$ | $3.352 \times 10^{-10}$  |
| <b>Co-tcbpe</b> in DMF + 60 $\mu\text{L}$ H <sub>2</sub> O  | $\tau_1=2.886$ ; $\tau_2=0.2900$ ;<br>$\tau_3=0.2874$ | $2.887 \times 10^{-10}$  |
| <b>Co-tcbpe</b> in DMF + 400 $\mu\text{L}$ MeOH             | $\tau_1=3.100$ ; $\tau_2=0.3081$ ;<br>$\tau_3=0.2774$ | $2.922 \times 10^{-10}$  |
| <b>Co-tcbpe</b> in DMF + 700 $\mu\text{L}$ EtOH             | $\tau_1=0.3426$ ; $\tau_2=3.019$ ;<br>$\tau_3=0.3197$ | $3.3166 \times 10^{-10}$ |
| <b>Co-tcbpe</b> in DMA                                      | $\tau_1=1.559$ ; $\tau_2=1.505$ ;<br>$\tau_3=17.06$   | $1.550 \times 10^{-9}$   |
| <b>Co-tcbpe</b> in DMA + 100 $\mu\text{L}$ H <sub>2</sub> O | $\tau_1=3.018$ ; $\tau_2=0.3130$ ;<br>$\tau_3=0.3122$ | $3.126 \times 10^{-10}$  |
| <b>Co-tcbpe</b> in DMA + 400 $\mu\text{L}$ MeOH             | $\tau_1=0.3823$ ; $\tau_2=3.127$ ;<br>$\tau_3=0.3748$ | $3.788 \times 10^{-10}$  |
| <b>Co-tcbpe</b> in DMA + 1500 $\mu\text{L}$ EtOH            | $\tau_1=0.3051$ ; $\tau_2=3.053$ ;<br>$\tau_3=0.4523$ | $3.646 \times 10^{-10}$  |
| <b>Co-tcbpe</b> in H <sub>2</sub> O                         | $\tau_1=0.3531$ ; $\tau_2=4.760$ ;<br>$\tau_3=0.3377$ | $3.454 \times 10^{-10}$  |
| <b>Co-tcbpe</b> in H <sub>2</sub> O + 350 $\mu\text{L}$ DMF | $\tau_1=5.105$ ; $\tau_2=0.3497$ ;                    | $3.506 \times 10^{-10}$  |

|                                                       |                                                       |                         |
|-------------------------------------------------------|-------------------------------------------------------|-------------------------|
|                                                       | $\tau_3=0.3514$                                       |                         |
| <b>Co-tcbpe</b> in H <sub>2</sub> O + 700 $\mu$ L DMA | $\tau_1=0.3118$ ; $\tau_2=0.3101$ ;<br>$\tau_3=5.784$ | $3.109 \times 10^{-10}$ |
| <b>Co-tcbpe</b> in EtOH                               | $\tau_1=0.4107$ ; $\tau_2=0.3762$ ;<br>$\tau_3=4.483$ | $3.938 \times 10^{-10}$ |
| <b>Co-tcbpe</b> in EtOH + 300 $\mu$ L DMA             | $\tau_1=0.2547$ ; $\tau_2=0.4692$ ;<br>$\tau_3=4.432$ | $3.235 \times 10^{-10}$ |
| <b>Co-tcbpe</b> in MeOH                               | $\tau_1=0.3449$ ; $\tau_2=3.470$ ;<br>$\tau_3=0.3350$ | $3.401 \times 10^{-10}$ |
| <b>Co-tcbpe</b> in MeOH + 500 $\mu$ L DMF             | $\tau_1=0.3753$ ; $\tau_2=3.815$ ;<br>$\tau_3=0.3521$ | $3.638 \times 10^{-10}$ |
| <b>Co-tcbpe</b> in DMSO                               | $\tau_1=1.030$ ; $\tau_2=5.525$ ;<br>$\tau_3=0.2074$  | $2.830 \times 10^{-10}$ |
| <b>Co-tcbpe</b> in DMSO + 40 $\mu$ L H <sub>2</sub> O | $\tau_1=1.883$ ; $\tau_2=9.608$ ;<br>$\tau_3=0.1153$  | $1.508 \times 10^{-10}$ |
| <b>Co-tcbpe</b> in DMSO + 70 $\mu$ L EtOH             | $\tau_1=0.9860$ ; $\tau_2=4.926$ ;<br>$\tau_3=0.1898$ | $2.593 \times 10^{-10}$ |
| <b>Co-tcbpe</b> in DMSO + 80 $\mu$ L MeOH             | $\tau_1=1.088$ ; $\tau_2=0.2013$ ;<br>$\tau_3=5.760$  | $2.770 \times 10^{-10}$ |

---

## Thermochromic Behavior

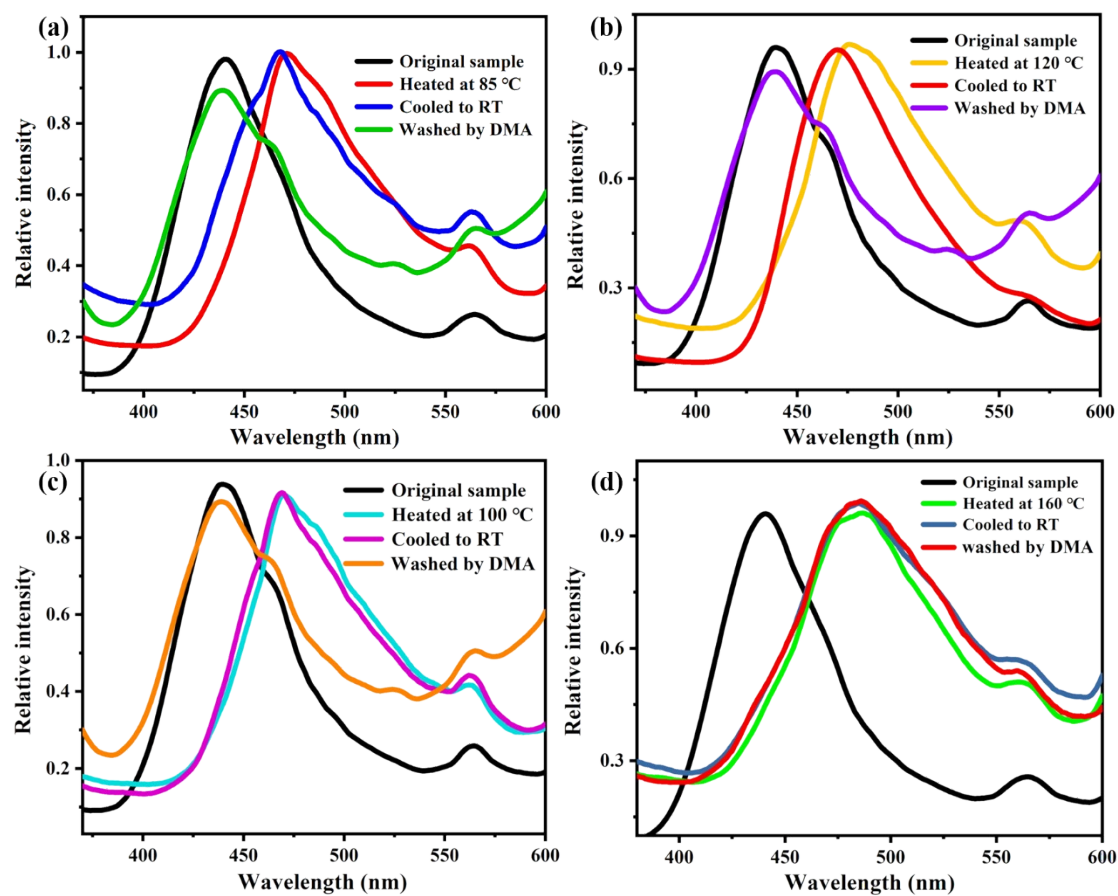

**Figure S14** The fluorescence spectra of the original and treated under different conditions of **Co-tcbpe**

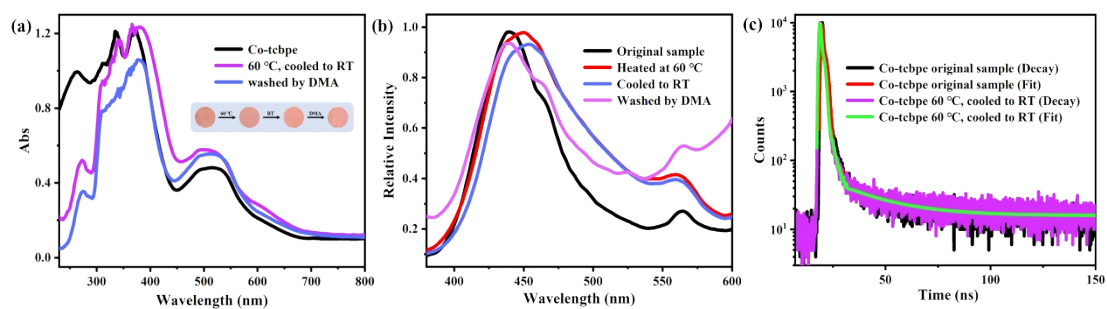

**Figure S15** The UV-Vis spectra (a), fluorescence emission spectrum (b) and fluorescence lifetime (c) of **Co-tcbpe** before and after being heated at 60 °C

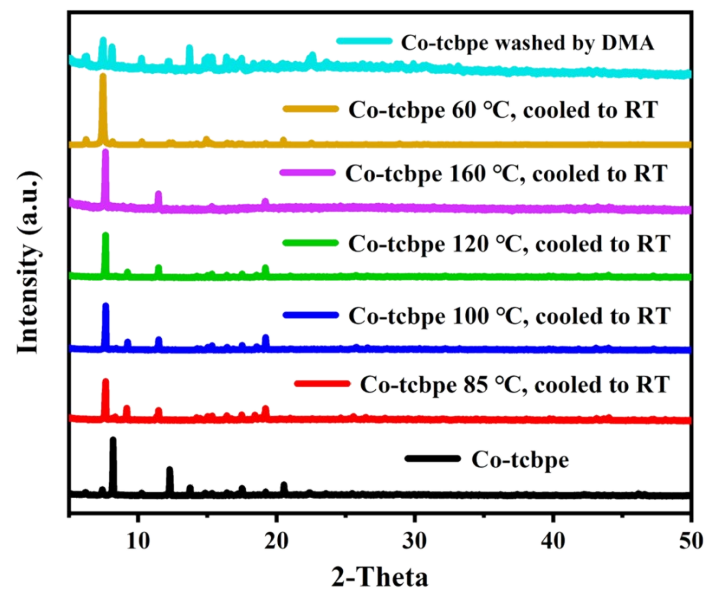

**Figure S16** The PXRD spectra of **Co-tcbpe** after being heated and cooled to RT

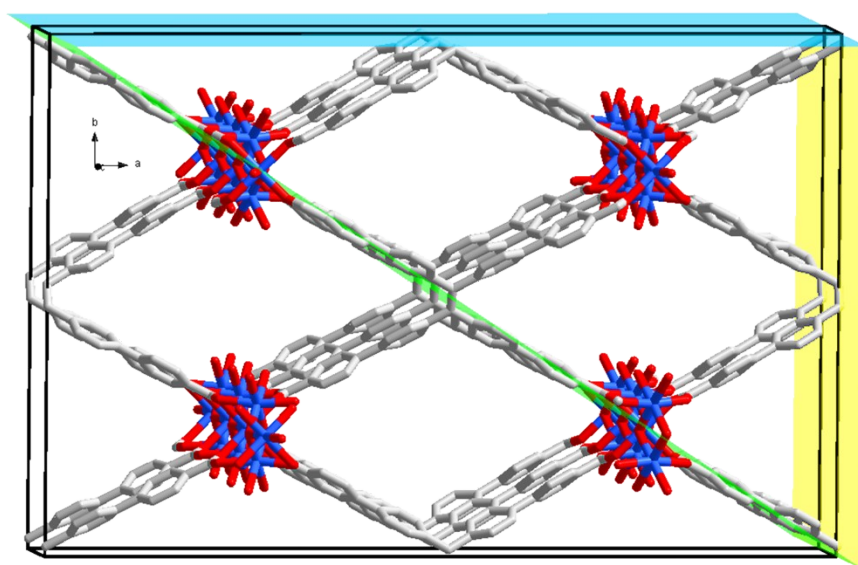

**Figure S17** Perspective view of lattice planes (010) (in blue), (100) (in yellow) and (110) (in green) for **Co-tcbpe** along the [001] axis (hydrogen atoms are omitted for clarity)

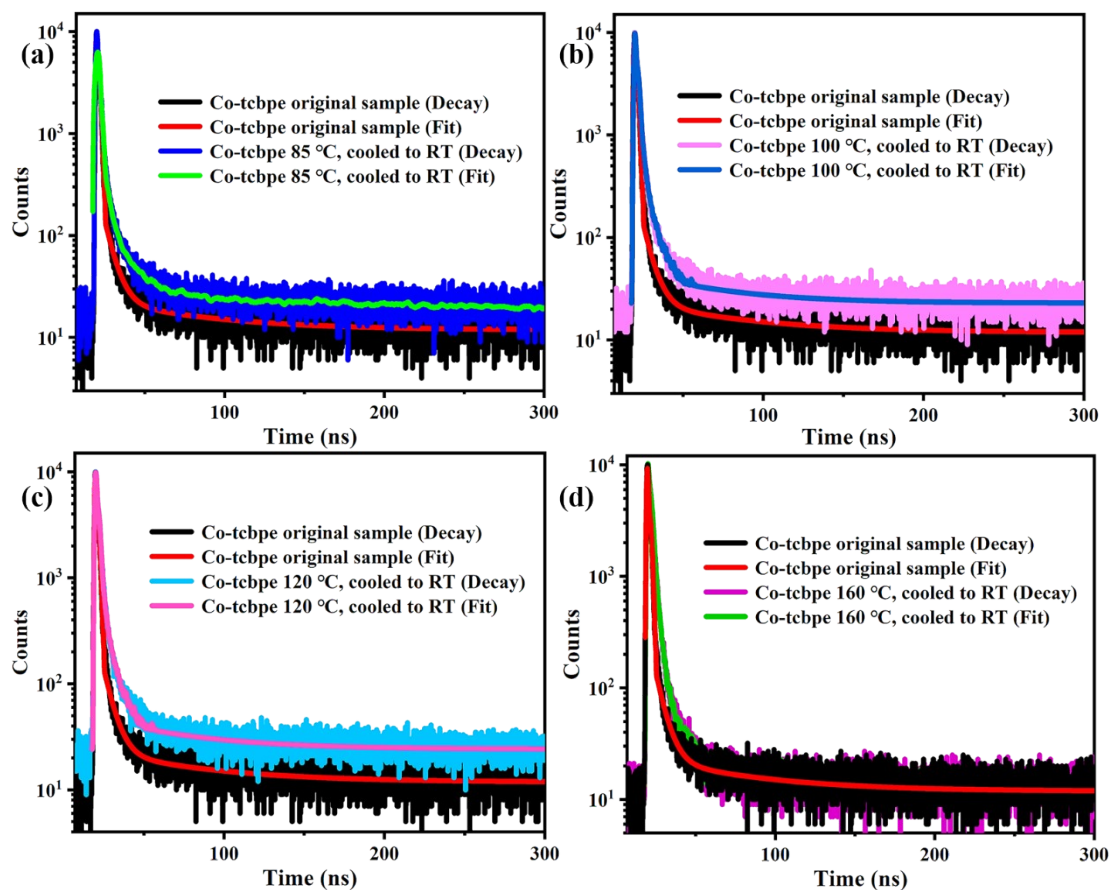

**Figure S18** The fluorescence lifetime of **Co-tcbpe** before and after being heated by different temperature

**Table S5** The fluorescence lifetime under different conditions samples of **Co-tcbpe**

| Sample                                  | Lifetime (ns)                                         | Average lifetime (s)    |
|-----------------------------------------|-------------------------------------------------------|-------------------------|
| <b>Co-tcbpe</b>                         | $\tau_1=5.714$ ; $\tau_2= 62.00$ , $\tau_3= 0.4534$   | $4.660 \times 10^{-11}$ |
| <b>Co-tcbpe 60 °C,</b><br>cooled to RT  | $\tau_1= 0.1340$ ; $\tau_2= 1.039$ ; $\tau_3= 22.36$  | $1.549 \times 10^{-10}$ |
| <b>Co-tcbpe 85 °C,</b><br>cooled to RT  | $\tau_1= 5.388$ , $\tau_2= 722.4$ ; $\tau_3= 0.1557$  | $1.991 \times 10^{-10}$ |
| <b>Co-tcbpe 100 °C,</b><br>cooled to RT | $\tau_1= 1.079$ ; $\tau_2= 51.50$ ; $\tau_3= 0.1303$  | $1.530 \times 10^{-10}$ |
| <b>Co-tcbpe 120 °C,</b><br>cooled to RT | $\tau_1= 1.049$ ; $\tau_2= 54.26$ ; $\tau_3= 0.1240$  | $1.408 \times 10^{-10}$ |
| <b>Co-tcbpe 160 °C, cooled</b>          | $\tau_1= 0.04437$ ; $\tau_2= 1.131$ ; $\tau_3= 8.627$ | $5.422 \times 10^{-11}$ |

## References

1. Z.-W. Wei, Z.-Y. Gu, R. K. Arvapally, Y.-P. Chen, Jr. R. N. McDougald, J. F. Ivy, A. A. Yakovenko, D.-W. Feng, M. A. Omary, and H.-C. Zhou, Rigidifying Fluorescent Linkers by Metal–Organic Framework Formation for Fluorescence Blue Shift and Quantum Yield Enhancement, *J. Am. Chem. Soc.* 2014, **136**, 8269–8276.
2. G. M. Sheldrick, A short history of SHELX, *Acta Cryst.* 2008, **A64**, 112-122.
3. G. M. Sheldrick, Crystal structure refinement with SHELXL, *Acta Cryst.* 2015, **C71**, 3-8.
4. O.-V. Dolomanov, L.-J. Bourhis, R.-J. Gildea, J. A. K. Howard, and H. Puschmann, OLEX2: a complete structure solution, refinement and analysis program, *J. Appl. Cryst.* 2009, **42**, 339-341.
